# Supplementary material for: Investigation of NbOx-based volatile switching device with self-rectifying characteristics
Source: Springer Nature journal article supplement (doi:10.1007/s11432-019-9894-0), 2019-11-08
Supplement: 11432_2019_9894_MOESM1_ESM.pdf [file 11432_2019_9894_MOESM1_ESM.pdf]

• Supplementary File •

## Investigation of NbO<sub>x</sub>-based volatile switching device with self-rectifying characteristics

Yichen FANG<sup>1</sup>, Zongwei WANG<sup>1</sup>, Caidie CHENG<sup>1</sup>, Zhizhen YU<sup>1</sup>, Teng ZHANG<sup>1</sup>,  
Yuchao YANG<sup>1</sup>, Yimao CAI<sup>1\*</sup> & Ru HUANG<sup>1</sup>

<sup>1</sup>Key Laboratory of Microelectronic Devices and Circuits (MOE),  
Institute of Microelectronics, Peking University, Beijing 100871, China

### Appendix A Supplementary figure

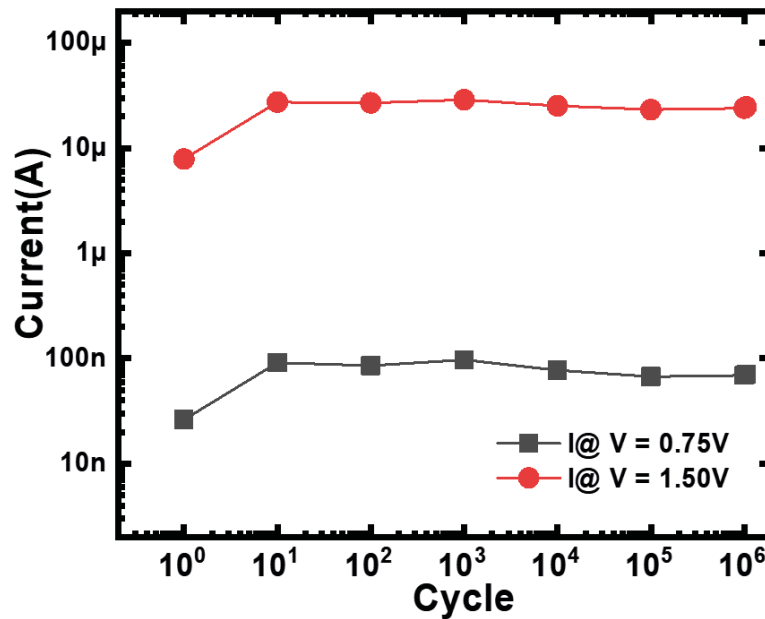

Figure A1 The endurance of the niobium-oxide based device is larger than 10<sup>6</sup>

\* Corresponding author (email: caiyimao@pku.edu.cn)
